# Supplementary material
Source: Springer Nature journal article supplement (https://www.springermedizin.de/resource/supplementary/13002_2008_136_MOESM5_ESM.pdf/9627318)

# Ethnobotanical plants - Habitats

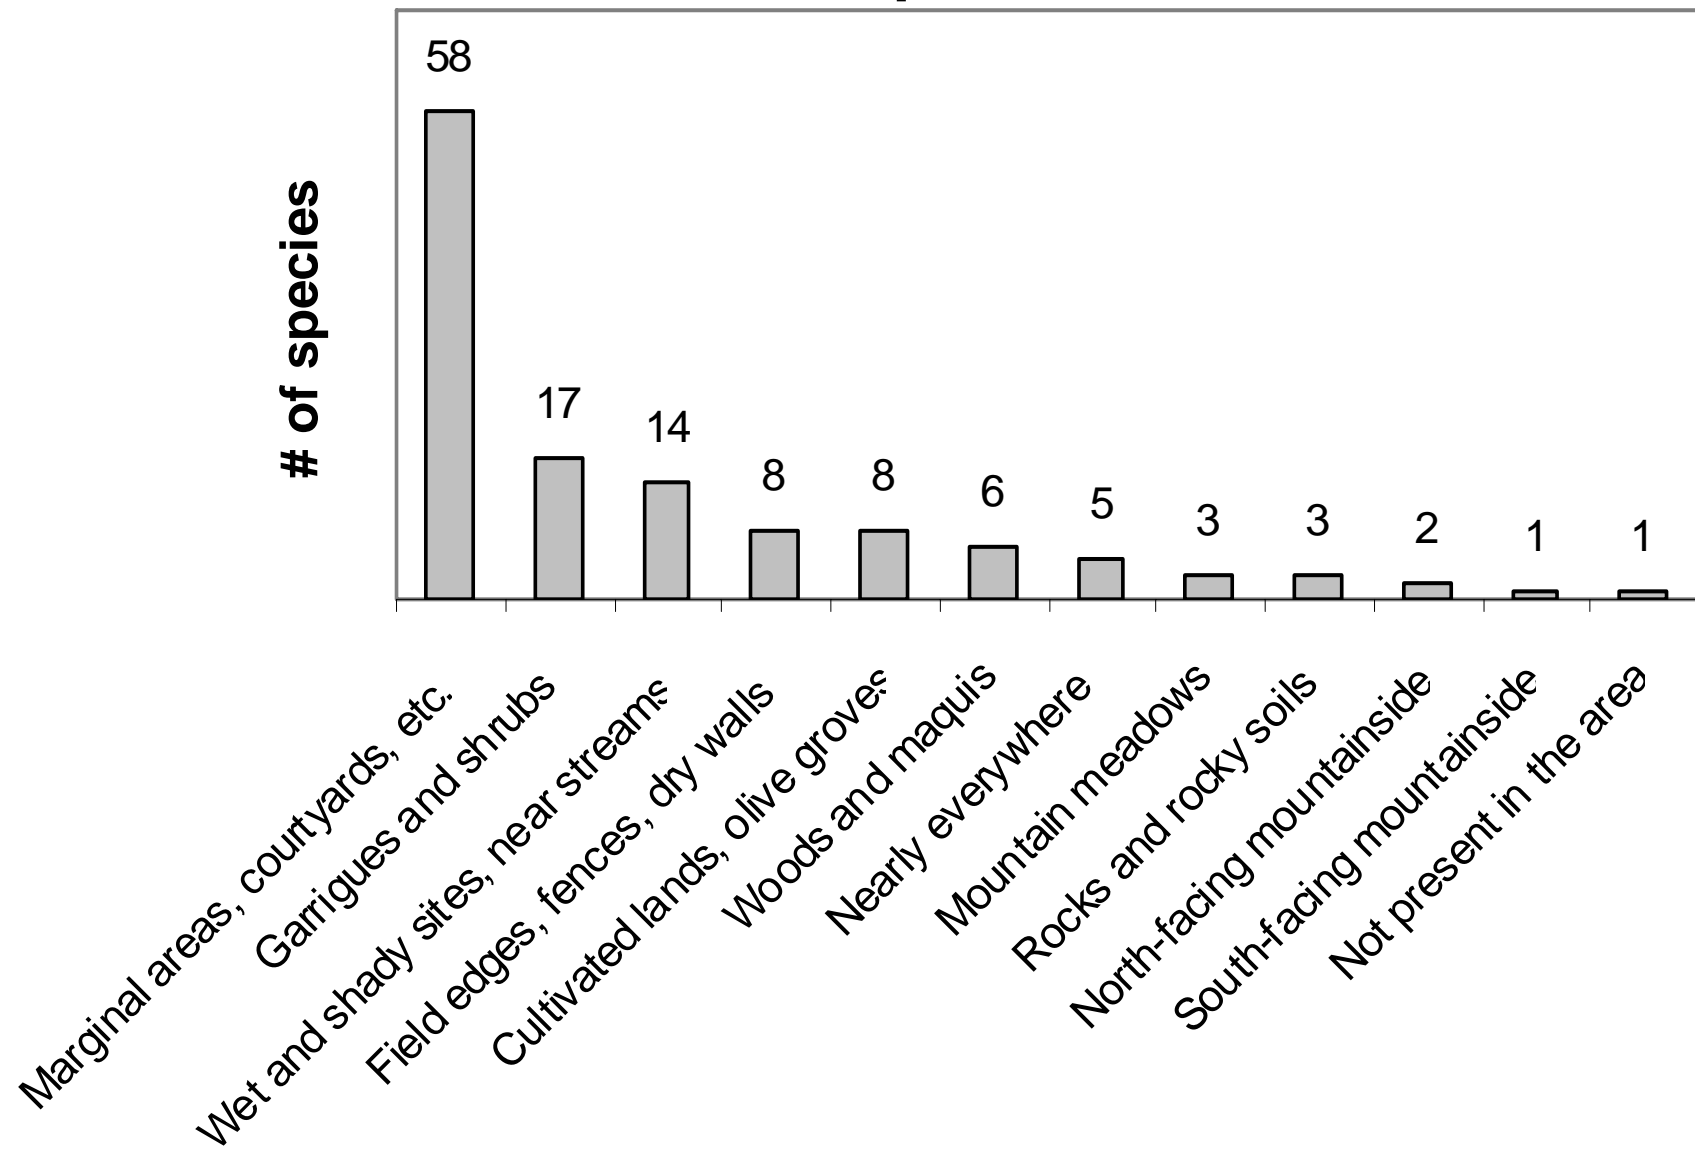

Supplement: MOESM5 [file 9627318]
